# Supplementary material for: Specific cultural and political challenges in cross-border public participation
Source: Copernicus journal article supplement (doi:10.5194/sand-1-227-2021), 2021-11-10
Supplement: Supplementary file 1 [file sand-1-227-2021-supplement.pdf]

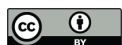

*Supplement of*

## **Specific cultural and political challenges in cross-border public participation**

**Franziska Sperfeld and Melanie Mbah**

*Correspondence to:* Franziska Sperfeld ([franziska.sperfeld@ufu.de](mailto:franziska.sperfeld@ufu.de))

The copyright of individual parts of the supplement might differ from the article licence.

Franziska Sperfeld  
Dr. Melanie Mbah

12.11.2021

# SPECIFIC CULTURAL AND POLITICAL CHALLENGES IN CROSS-BORDER PUBLIC PARTICIPATION

© Dylan Gillis on Unsplash

## First results from a literature review on cross-border public participation

1. Research project HERüber
2. Challenges and success factors for cross-border public participation procedures
3. Specific cultural and political framework conditions in neighbouring countries
4. Outlook

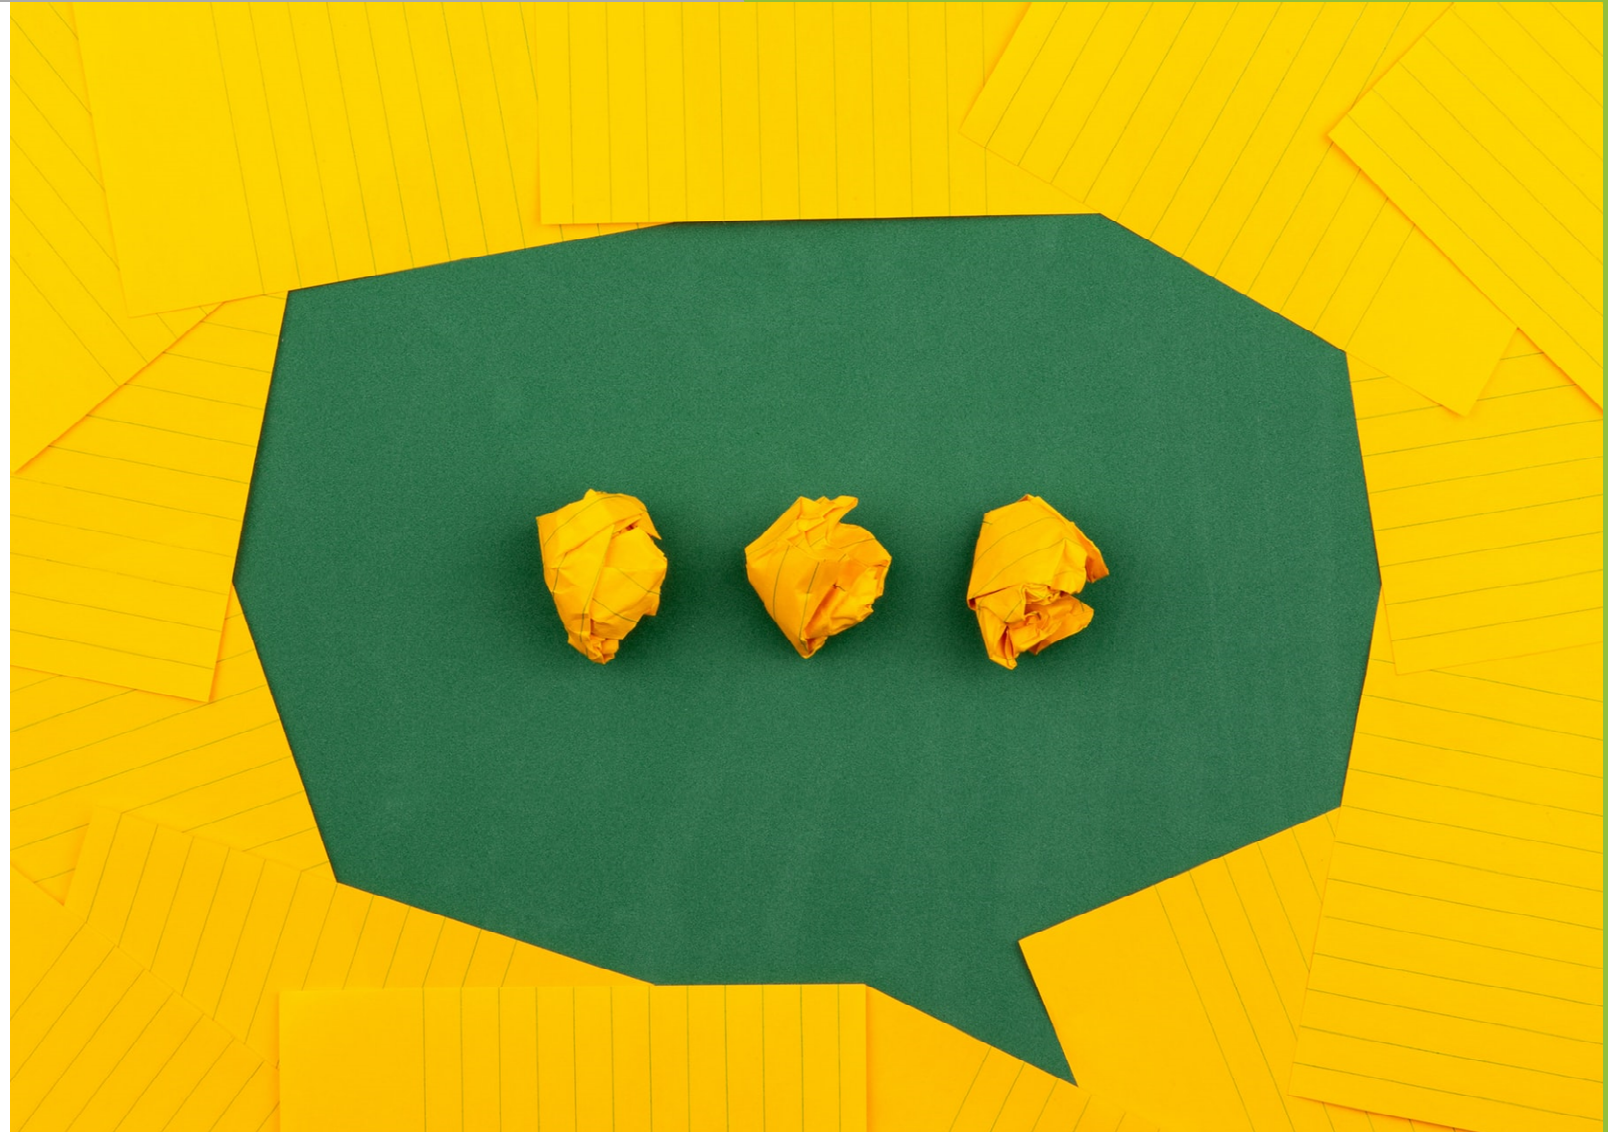

© Volodymyr Hryshchenko on Unsplash



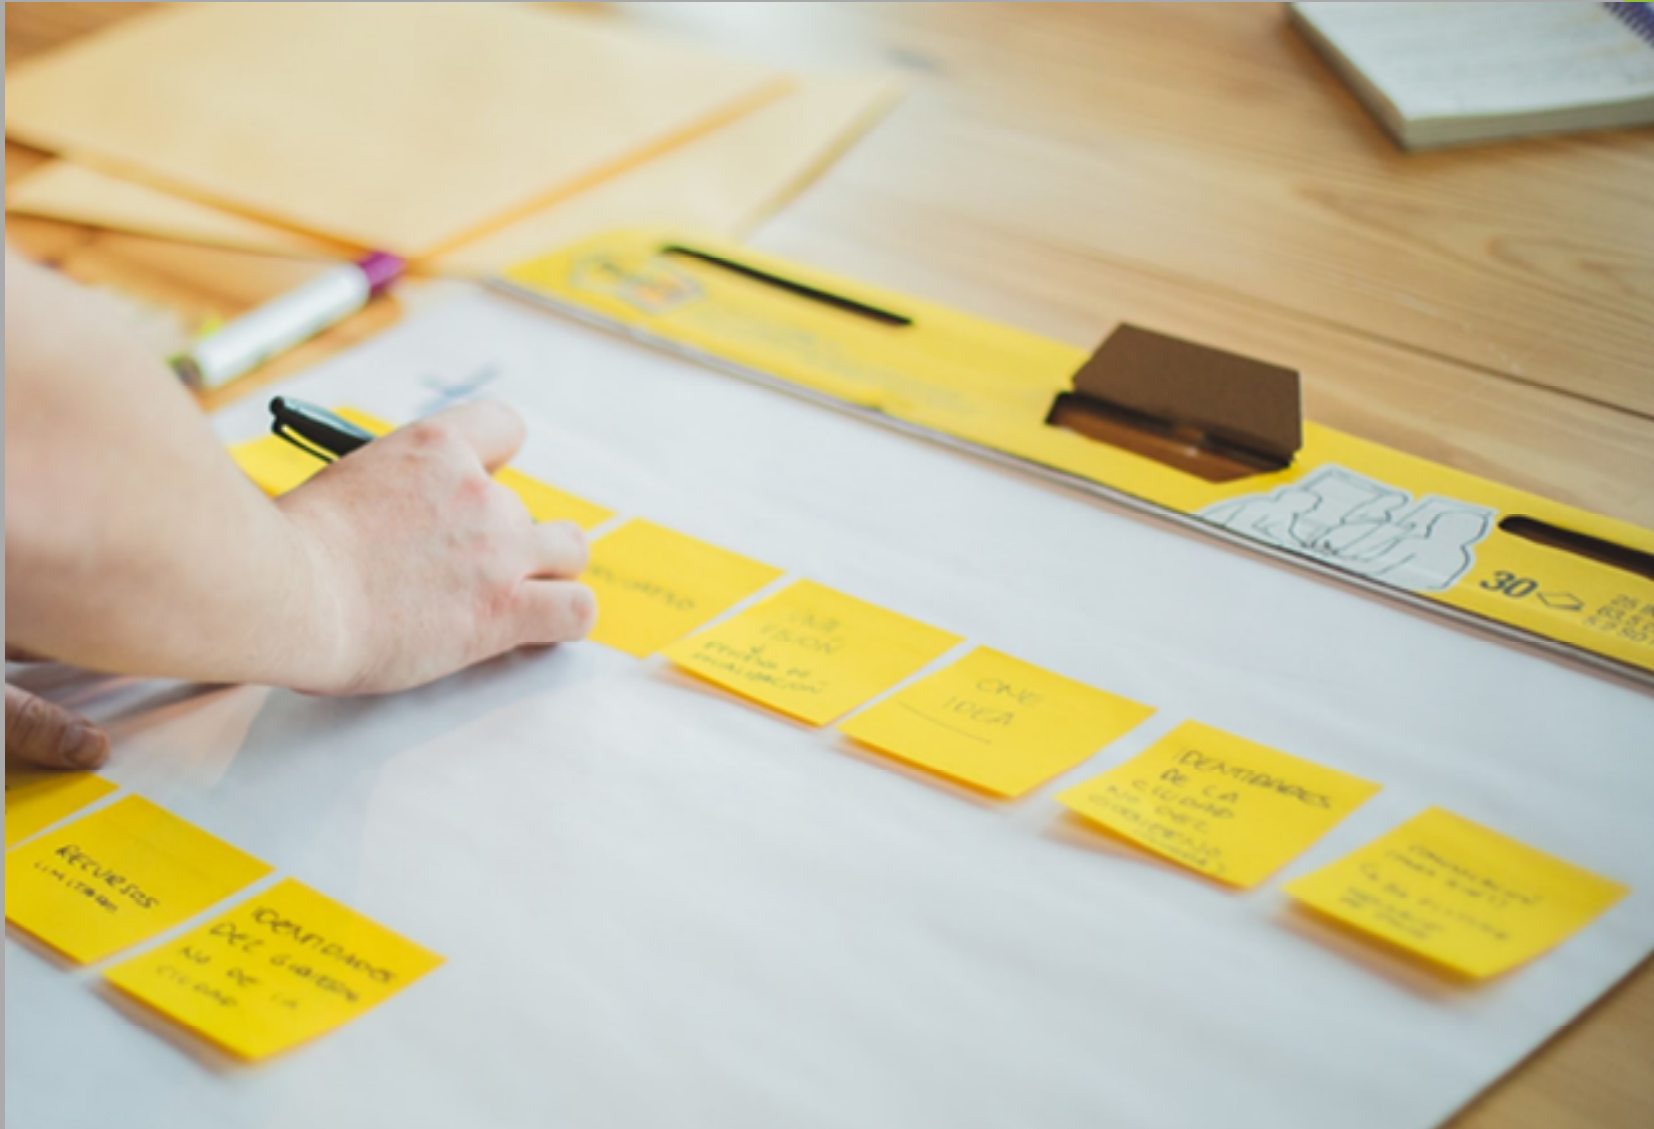

© Brands&People on Unsplash

The research project HErüber analyses specific risks and obstacles, as well as cultural and political framework conditions for transboundary public participation.

### Work packages

Literature review

Legal Analysis

Case Studies

Needs in neighbouring countries

Synthesis and recommendations

## Challenges for cross-border public participation procedures

### Risks and obstacles of **public participation in the search for a nuclear repository**

- Acceptance of the search procedure is a prerequisite for the acceptability of the repository site
- Complexity
- Constellations of actors
- Lack of knowledge and knowledge asymmetries
- Politicisation / Conflict

### Risks and obstacles of **transboundary public participation**

- Unequal opportunities for foreign and domestic stakeholders
- Procedural uncertainties
- High time and resource requirements
- Language barriers
- Different competences in transboundary public participation and interdependencies with regional competences and networks
- Low interest of the foreign public

## Success factors for...

### ... public participation in the search for a nuclear repository

- Ensuring fairness of the procedure
- Countering complexity
- Deal with changing actors constellations

### ... transboundary public participation

- Clarity of the process / Good explanation of the process, roles, tasks and responsibilities
- Early participation for all
- Planning appropriate resources and flexibility
- Quality translation and interpretation

- Use of clear language, detailed graphics and maps
- Willingness to communicate and cooperate
- Sensitive handling of intercultural differences
- Measures to activate the foreign public

## Specific cultural and political framework conditions in neighbouring countries

- **Political framework** = democratic structure, legal prerequisites and institutional setting
- **Cultural framework** = norms, traditions, meanings and attitudes of different social groups in a specific region or national context

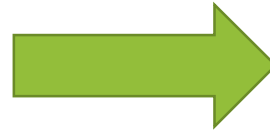

**Neighbouring countries** differ as well regarding collaborative decision making processes → long tradition vs. no or little experience

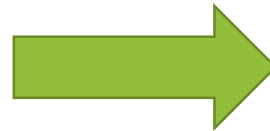

**National contexts** differ internal, e.g. with regard to participation and attitudes towards nuclear facilities

## Influence of political culture on participation

### Five dimensions of culture

(Source: <https://geerthofstede.com/>; Enserink et al. 2007)

Relevance for participation:

- high power distance = rather top-down decision making
- collective orientation = more participatory processes
- traditional role models = less participation
- strong catholic influence = less participation

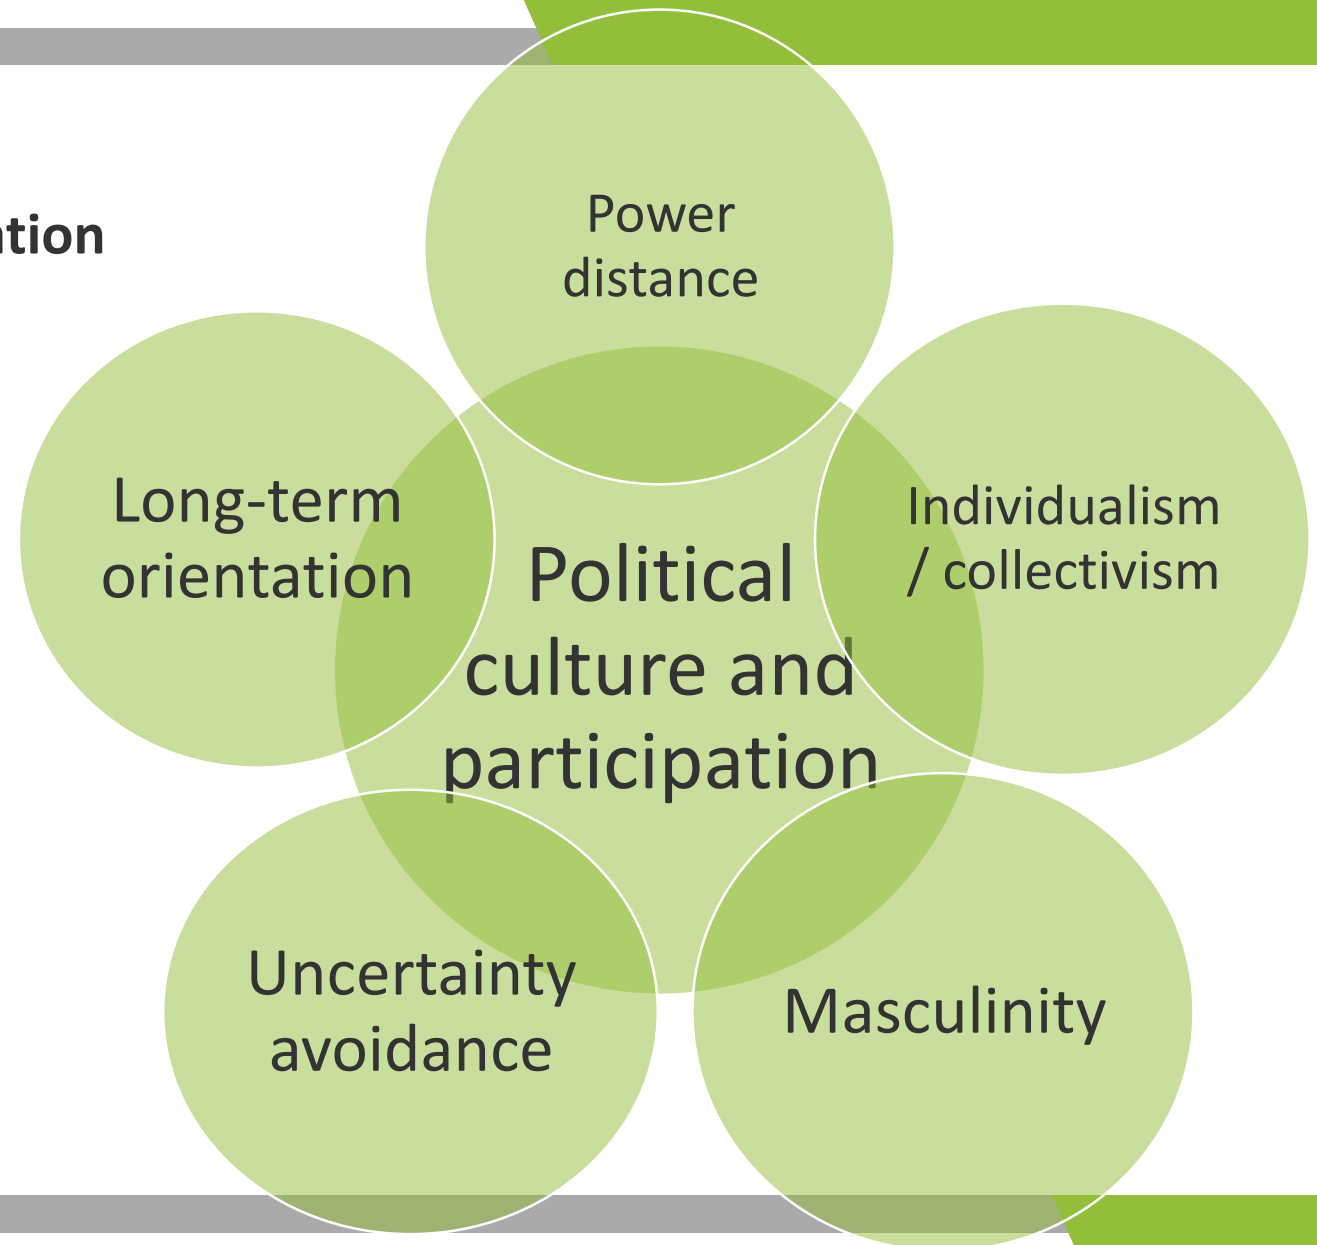



## Neighbouring countries with high requirements for participation and rather critical attitude towards nuclear facilities

|                                            | Denmark                                                                                                         | Netherlands                                                                                                                                     | Austria                                                                                                               | Switzerland                                                                                                                           |
|--------------------------------------------|-----------------------------------------------------------------------------------------------------------------|-------------------------------------------------------------------------------------------------------------------------------------------------|-----------------------------------------------------------------------------------------------------------------------|---------------------------------------------------------------------------------------------------------------------------------------|
| <b>participation experience</b>            | long tradition in participatory processes (e.g. consensus conferences); role models not so important            | <b>long tradition in early stakeholder-participation</b> with consensus orientation; <b>role models not so important; power distance little</b> | lots of guidelines for participatory processes, some direct democratic elements institutionalised                     | <b>half-direct democracy model</b> with <b>plebiscites on all political levels</b> ; early information of public and referenda common |
| <b>attitude towards nuclear facilities</b> | early societal resistance against nuclear energy, three decommissioned research reactors, no commercial reactor | <b>early and strong societal resistance</b> and <b>rather negative attitude towards nuclear facilities</b> ; small-scale nuclear programme      | high risk perception of and strong opposition towards nuclear facilities; no commercial and only one research reactor | <b>ambivalent attitude towards nuclear facilities</b> ; five commercial reactors, but decision to opt out                             |

## Neighbouring countries with diverse participation experiences and rather positive attitude towards nuclear facilities

|                                            | France                                                                                                                                                                        | Czech Republic                                                                                       | Poland                                                                                                                     | Belgium                                                                                                                  |
|--------------------------------------------|-------------------------------------------------------------------------------------------------------------------------------------------------------------------------------|------------------------------------------------------------------------------------------------------|----------------------------------------------------------------------------------------------------------------------------|--------------------------------------------------------------------------------------------------------------------------|
| <b>participation experience</b>            | ambivalent: <b>tradition of social movements</b> , at the same time until 1980ies <b>centralized characteristic and traditional top-down</b> decision-making (power distance) | still young democracy (since 1992) with little importance of participatory elements (power distance) | <b>strong role models and high uncertainty avoidance as well as power distance</b> ; participatory elements less important | high power distance and uncertainty avoidance and as well strong role models; little participation experience            |
| <b>attitude towards nuclear facilities</b> | <b>risk perception of nuclear facilities less marked</b> ; 58 commercial reactors                                                                                             | 6 commercial reactors, rather nuclear friendly attitude, oppositional groups marginalized            | up to date no commercial reactor; <b>regionally diverse attitude</b> (e.g. negative in cross-border region to Germany)     | ambivalent attitude and ongoing controversy regarding site selection; risk perception less marked; 7 commercial reactors |

## Potential border regions

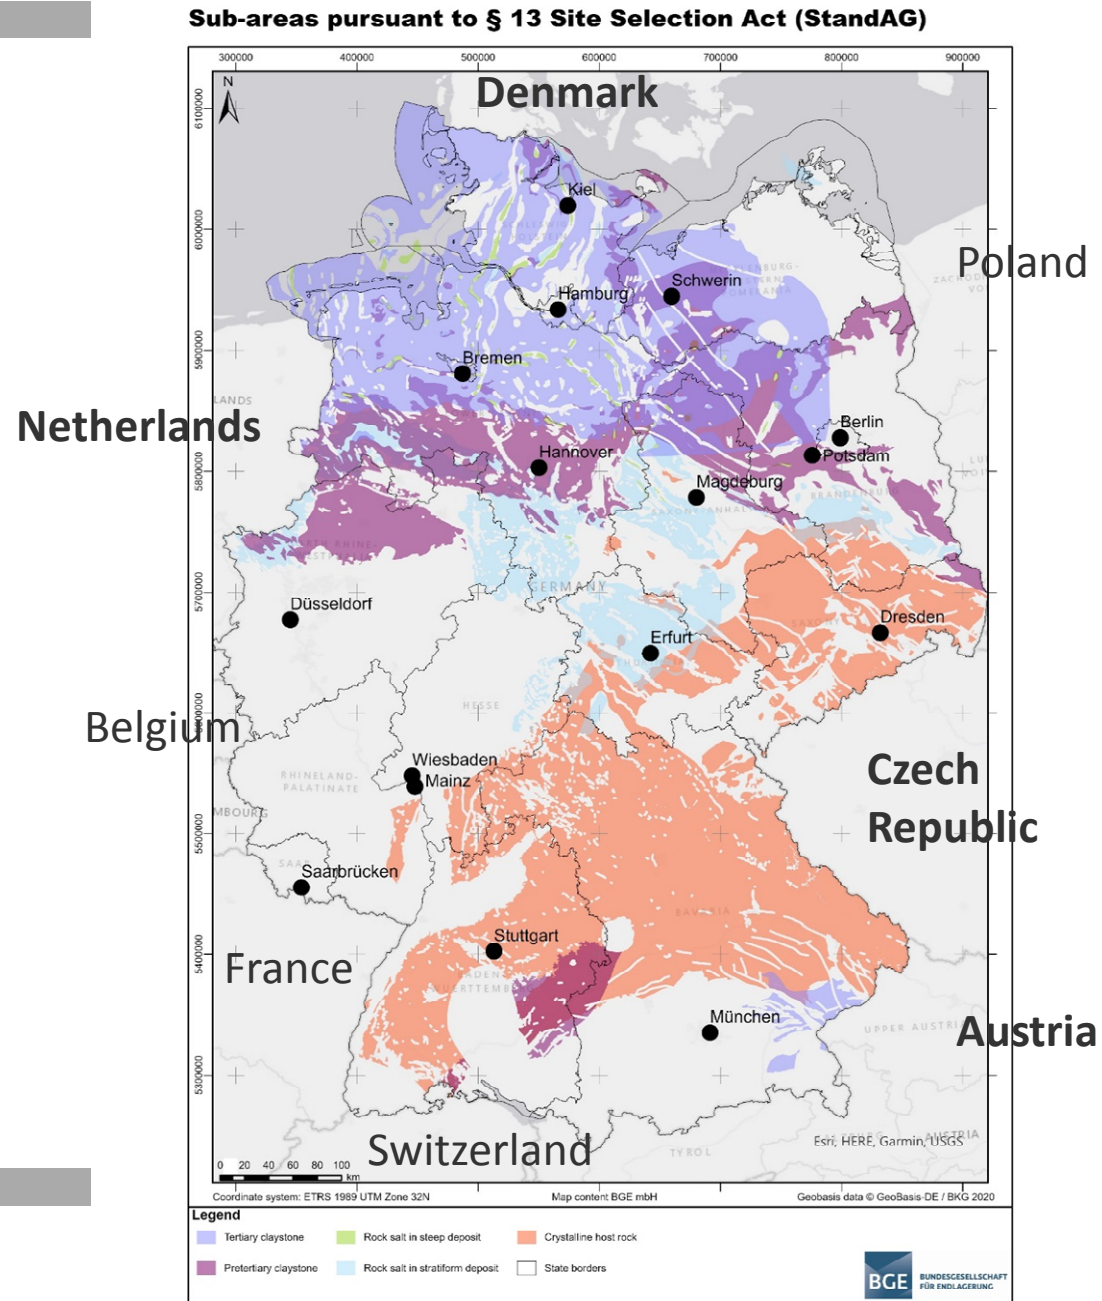

## Outlook

Work package 3: exploration of challenges and success factors of cross-border participation towards three case studies

- Swiss planning procedure on deep geological disposal (CH)
- EIA for the extension of the nuclear power plants in Dukovany (CZ)
- SEA for the revision of Maritime spatial plans (DE)

Work package 5: requirements for cross-border participation in potential regions

- Five cross-border regions will be analysed regarding participation requirements

# Thank you!

Contacts:

Franziska Sperfeld  
[franziska.sperfeld@ufu.de](mailto:franziska.sperfeld@ufu.de)

Dr. Melanie Mbah  
[m.mbah@oeko.de](mailto:m.mbah@oeko.de)

All presented concepts, ideas and texts are intellectual property of UfU e.V.

Any use of the content is prohibited and has to be requested and approved in a written format by the authors.

© Unabhängiges Institut für Umweltfragen, 22.10.20
